# Supplementary material
Source: PubMed Central journal article supplement (PMC8543487)
Supplement: NIHMS1696143-supplement-Supplemental_Info.pdf [file NIHMS1696143-supplement-Supplemental_Info.pdf]

# Heterogeneity of Glycan Processing on Trimeric SARS-CoV-2 Spike Protein Revealed by Charge Detection Mass Spectrometry

Lohra M. Miller,<sup>a</sup> Lauren F. Barnes,<sup>a</sup> Shannon A. Raab,<sup>a</sup> Benjamin E. Draper,<sup>b</sup> Tarick J. El-Baba,<sup>c</sup> Corinne A. Lutomski,<sup>c</sup> Carol V. Robinson,<sup>c</sup> David E. Clemmer,<sup>a</sup> and Martin F. Jarrold<sup>a</sup>

<sup>a</sup>*Chemistry Department, Indiana University, 800 E Kirkwood Ave, Bloomington Indiana 47405*

<sup>b</sup>*Megadalton Solutions, 3520 E Bluebird Ln, Bloomington Indiana 47401*

<sup>c</sup>*Department of Chemistry, University of Oxford, South Parks Road, Oxford, OXI 3QZ, UK*

Supporting Information

## CDMS Mass Resolution with 100 ms Trapping Time

In CDMS, the mass resolution has contributions from the  $m/z$  resolution and the charge resolution:

$$\frac{\Delta m}{m} = \sqrt{\left(\frac{\Delta[m/z]}{[m/z]}\right)^2 + \left(\frac{\Delta z}{z}\right)^2} \quad (1)$$

Where  $\Delta m$ ,  $\Delta[m/z]$ , and  $\Delta z$  are the peak full widths at half maximum (FWHM) in the mass,  $m/z$ , and charge distributions. The 100 ms trapping measurements reported in the manuscript were performed on our prototype CDMS instrument.<sup>1</sup> On this instrument, the relative root mean square deviation (RMSD) in the  $m/z$  measurement,  $\sigma[m/z]/[m/z]$ , is around 0.0054.<sup>2</sup> The charge RMSD ( $\sigma z$ ) depends on both the oscillation frequency ( $f$ ) and the trapping time ( $t_{trap}$ ) and is given approximately by<sup>3</sup>

$$\sigma z = 25.58 \frac{f^{-0.457}}{t_{trap}^{0.5}} \quad (2)$$

The oscillation frequency and  $m/z$  are related through the following equation,

$$\frac{m}{z} = \frac{C}{f^2} \quad (3)$$

where  $C$  is a constant that depends on the ion energy and trap geometry. For the spike trimer at 475 kDa in Figure 5 of the manuscript the average  $m/z$  is around 10,000 Da, and the average oscillation frequency is around 16,000 Hz. For a 100 ms trapping time, the charge RMSD is 0.97 e, according to Equation 2. This leads to a relative charge RMSD ( $\sigma z/z$ ) of around 0.0205. Combining the relative RMSDs in the charge ( $\sigma z/z$ ) and  $m/z$  ( $\sigma[m/z]/[m/z]$ ) leads to the relative RMSD in the mass ( $\sigma m/m$ ), which is around 0.0212. Thus, the full width at half maximum (FWHM) of the spike trimer peak at 475 kDa in Figure 5 due to instrumental resolution is  $0.0212 \times 2.35 \times 475 = 23.7$  kDa, where the factor of 2.35 converts from RMSD to peak FWHM.

## References

- <sup>1</sup> N. C. Contino and M. F. Jarrold, *Charge Detection Mass Spectrometry for Single Ions With a Limit of Detection of 30 Charges*, *Int. J. Mass Spectrom.* **2013**, 345–347, 153-159.  
<https://doi.org/10.1016/j.ijms.2012.07.010>
- <sup>2</sup> Hogan, J. A.; Jarrold, M. F. Optimized electrostatic linear ion trap for charge detection mass spectrometry. *J. Am. Soc. Mass Spectrom.* **2018**, 29, 2086-2095.  
<https://doi.org/10.1007/s13361-018-2007-x>
- <sup>3</sup> D. Z. Keifer, T. Motwani, C. M. Teschke, and M. F. Jarrold, Acquiring Structural Information on Virus Particles Via Charge Detection Mass Spectrometry, *J. Am. Soc. Mass Spectrom.* **2016**, 27, 1028-1036. <https://doi.org/10.1007/s13361-016-1362-8>
